# Supplementary material for: 4-Phenylnaphtho[2,3-c]furan-1(3H)-one, 9-Phenylnaphtho[2,3-c]furan-1(3H)-one and 3a,4-Dihydro-9-phenylnaphtho[2,3-c]furan-1(3H)-one Crystal Structures
Source: MDPI journal article supplement (doi:10.3390/cryst11080857), 2021-07-23

# checkCIF/PLATON report

Structure factors have been supplied for datablock(s) 2, 3, 5, Mixture2-3

THIS REPORT IS FOR GUIDANCE ONLY. IF USED AS PART OF A REVIEW PROCEDURE FOR PUBLICATION, IT SHOULD NOT REPLACE THE EXPERTISE OF AN EXPERIENCED CRYSTALLOGRAPHIC REFEREE.

No syntax errors found.      CIF dictionary      Interpreting this report

## Datablock: 2

---

|                 |                |                    |             |
|-----------------|----------------|--------------------|-------------|
| Bond precision: | C-C = 0.0028 Å | Wavelength=0.71073 |             |
| Cell:           | a=10.0988(5)   | b=16.7625(8)       | c=8.0793(4) |
|                 | alpha=90       | beta=94.699(2)     | gamma=90    |
| Temperature:    | 296 K          |                    |             |
|                 | Calculated     | Reported           |             |
| Volume          | 1363.08(12)    | 1363.08(12)        |             |
| Space group     | P 21/c         | P 1 21/c 1         |             |
| Hall group      | -P 2ybc        | -P 2ybc            |             |
| Moiety formula  | C18 H12 O2     | C18 H12 O2         |             |
| Sum formula     | C18 H12 O2     | C18 H12 O2         |             |
| Mr              | 260.28         | 260.28             |             |
| Dx,g cm-3       | 1.268          | 1.268              |             |
| Z               | 4              | 4                  |             |
| Mu (mm-1)       | 0.082          | 0.082              |             |
| F000            | 544.0          | 544.0              |             |
| F000'           | 544.26         |                    |             |
| h,k,lmax        | 14,23,11       | 14,23,11           |             |
| Nref            | 3996           | 3988               |             |
| Tmin,Tmax       | 0.962,0.988    | 0.708,0.746        |             |
| Tmin'           | 0.927          |                    |             |

Correction method= # Reported T Limits: Tmin=0.708 Tmax=0.746  
AbsCorr = MULTI-SCAN

Data completeness= 0.998      Theta(max)= 30.047

R(reflections)= 0.0842( 2997)      wR2(reflections)= 0.2543( 3988)

S = 1.105      Npar= 181

---

The following ALERTS were generated. Each ALERT has the format

**test-name\_ALERT\_alert-type\_alert-level.**

Click on the hyperlinks for more details of the test.

---

### Alert level B

DIFMN02\_ALERT\_2\_B The minimum difference density is < -0.1\*ZMAX\*1.00  
\_refine\_diff\_density\_min given = -1.045  
Test value = -0.800

|                                                                    |              |
|--------------------------------------------------------------------|--------------|
| PLAT097_ALERT_2_B Large Reported Max. (Positive) Residual Density  | 1.04 eA-3    |
| PLAT098_ALERT_2_B Large Reported Min. (Negative) Residual Density  | -1.04 eA-3   |
| PLAT919_ALERT_3_B Reflection # Likely Affected by the Beamstop ... | 1 Check      |
| PLAT934_ALERT_3_B Number of (Iobs-Icalc)/Sigma(W) > 10 Outliers .. | 4 Check      |
| PLAT939_ALERT_3_B Large Value of Not (SHELXL) Weight Optimized S . | 104.01 Check |

**Author Response: deflection dot is under the beam stopper**

---

### Alert level C

DIFMN03\_ALERT\_1\_C The minimum difference density is < -0.1\*ZMAX\*0.75  
The relevant atom site should be identified.

DIFMX02\_ALERT\_1\_C The maximum difference density is > 0.1\*ZMAX\*0.75  
The relevant atom site should be identified.

|                                                                    |             |
|--------------------------------------------------------------------|-------------|
| PLAT241_ALERT_2_C High 'MainMol' Ueq as Compared to Neighbors of   | C17 Check   |
| PLAT242_ALERT_2_C Low 'MainMol' Ueq as Compared to Neighbors of    | C13 Check   |
| PLAT331_ALERT_2_C Small Aver Phenyl C-C Dist C13 --C18 .           | 1.37 Ang.   |
| PLAT906_ALERT_3_C Large K Value in the Analysis of Variance .....  | 4.720 Check |
| PLAT911_ALERT_3_C Missing FCF Refl Between Thmin & STh/L= 0.600    | 8 Report    |
| PLAT918_ALERT_3_C Reflection(s) with I(obs) much Smaller I(calc) . | 7 Check     |
| PLAT976_ALERT_2_C Check Calcd Resid. Dens. 0.76A From O1           | -0.77 eA-3  |
| PLAT977_ALERT_2_C Check Negative Difference Density on H5          | -0.47 eA-3  |
| PLAT977_ALERT_2_C Check Negative Difference Density on H12         | -0.43 eA-3  |
| PLAT977_ALERT_2_C Check Negative Difference Density on H18         | -0.39 eA-3  |

---

### Alert level G

|                                                                    |              |
|--------------------------------------------------------------------|--------------|
| PLAT019_ALERT_1_G _diffrn_measured_fraction_theta_full/*_max < 1.0 | 0.998 Report |
| PLAT063_ALERT_4_G Crystal Size Possibly too Large for Beam Size .. | 0.92 mm      |
| PLAT072_ALERT_2_G SHELXL First Parameter in WGHT Unusually Large   | 0.15 Report  |
| PLAT720_ALERT_4_G Number of Unusual/Non-Standard Labels .....      | 1 Note       |
| PLAT883_ALERT_1_G No Info/Value for _atom_sites_solution_primary . | Please Do !  |
| PLAT910_ALERT_3_G Missing # of FCF Reflection(s) Below Theta(Min). | 1 Note       |
| PLAT978_ALERT_2_G Number C-C Bonds with Positive Residual Density. | 0 Info       |
| PLAT992_ALERT_5_G Repd & Actual _reflns_number_gt Values Differ by | 5 Check      |

- 
- 0 **ALERT level A** = Most likely a serious problem - resolve or explain  
6 **ALERT level B** = A potentially serious problem, consider carefully  
12 **ALERT level C** = Check. Ensure it is not caused by an omission or oversight  
8 **ALERT level G** = General information/check it is not something unexpected

- 4 ALERT type 1 CIF construction/syntax error, inconsistent or missing data  
12 ALERT type 2 Indicator that the structure model may be wrong or deficient  
7 ALERT type 3 Indicator that the structure quality may be low  
2 ALERT type 4 Improvement, methodology, query or suggestion  
1 ALERT type 5 Informative message, check
-

## Datablock: 3

---

Bond precision: C-C = 0.0019 A

Wavelength=0.71073

Cell: a=9.1899(10) b=17.7239(16) c=7.7263(8)  
alpha=90 beta=91.711(4) gamma=90

Temperature: 296 K

|                | Calculated  | Reported    |
|----------------|-------------|-------------|
| Volume         | 1257.9(2)   | 1257.9(2)   |
| Space group    | P 21/c      | P 1 21/c 1  |
| Hall group     | -P 2ybc     | -P 2ybc     |
| Moiety formula | C18 H12 O2  | C18 H12 O2  |
| Sum formula    | C18 H12 O2  | C18 H12 O2  |
| Mr             | 260.28      | 260.28      |
| Dx,g cm-3      | 1.374       | 1.374       |
| Z              | 4           | 4           |
| Mu (mm-1)      | 0.089       | 0.089       |
| F000           | 544.0       | 544.0       |
| F000'          | 544.26      |             |
| h,k,lmax       | 12,24,10    | 12,24,10    |
| Nref           | 3399        | 3393        |
| Tmin,Tmax      | 0.964,0.983 | 0.578,0.746 |
| Tmin'          | 0.964       |             |

Correction method= # Reported T Limits: Tmin=0.578 Tmax=0.746

AbsCorr = MULTI-SCAN

Data completeness= 0.998

Theta(max)= 29.144

R(reflections)= 0.0458( 2396)

wR2(reflections)= 0.1470( 3393)

S = 1.075

Npar= 181

---

The following ALERTS were generated. Each ALERT has the format

**test-name\_ALERT\_alert-type\_alert-level.**

Click on the hyperlinks for more details of the test.

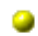

### Alert level C

|                                                                    |       |        |
|--------------------------------------------------------------------|-------|--------|
| PLAT906_ALERT_3_C Large K Value in the Analysis of Variance .....  | 2.265 | Check  |
| PLAT911_ALERT_3_C Missing FCF Refl Between Thmin & STh/L= 0.600    | 2     | Report |
| PLAT918_ALERT_3_C Reflection(s) with I(obs) much Smaller I(calc) . | 1     | Check  |
| PLAT934_ALERT_3_C Number of (Iobs-Icalc)/Sigma(W) > 10 Outliers .. | 1     | Check  |
| PLAT939_ALERT_3_C Large Value of Not (SHELXL) Weight Optimized S . | 11.94 | Check  |

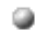

### Alert level G

|                                                               |   |      |
|---------------------------------------------------------------|---|------|
| PLAT720_ALERT_4_G Number of Unusual/Non-Standard Labels ..... | 1 | Note |
|---------------------------------------------------------------|---|------|

PLAT883\_ALERT\_1\_G No Info/Value for \_atom\_sites\_solution\_primary . Please Do !  
 PLAT912\_ALERT\_4\_G Missing # of FCF Reflections Above STh/L= 0.600 6 Note  
 PLAT913\_ALERT\_3\_G Missing # of Very Strong Reflections in FCF .... 2 Note  
 PLAT941\_ALERT\_3\_G Average HKL Measurement Multiplicity ..... 4.7 Low  
 PLAT978\_ALERT\_2\_G Number C-C Bonds with Positive Residual Density. 6 Info

---

0 **ALERT level A** = Most likely a serious problem - resolve or explain  
 0 **ALERT level B** = A potentially serious problem, consider carefully  
 5 **ALERT level C** = Check. Ensure it is not caused by an omission or oversight  
 6 **ALERT level G** = General information/check it is not something unexpected

1 ALERT type 1 CIF construction/syntax error, inconsistent or missing data  
 1 ALERT type 2 Indicator that the structure model may be wrong or deficient  
 7 ALERT type 3 Indicator that the structure quality may be low  
 2 ALERT type 4 Improvement, methodology, query or suggestion  
 0 ALERT type 5 Informative message, check

---

## Datablock: Mixture2-3

---

Bond precision: C-C = 0.0020 A Wavelength=0.71073

Cell: a=9.2069(17) b=17.797(3) c=7.7530(17)  
 alpha=90 beta=91.170(8) gamma=90

Temperature: 296 K

|                | Calculated  | Reported    |
|----------------|-------------|-------------|
| Volume         | 1270.1(4)   | 1270.1(4)   |
| Space group    | P 21/c      | P 21/c      |
| Hall group     | -P 2ybc     | -P 2ybc     |
| Moiety formula | C18 H14 O2  | ?           |
| Sum formula    | C18 H14 O2  | C18 H14 O2  |
| Mr             | 262.29      | 262.29      |
| Dx,g cm-3      | 1.372       | 1.372       |
| Z              | 4           | 4           |
| Mu (mm-1)      | 0.088       | 0.088       |
| F000           | 552.0       | 552.0       |
| F000'          | 552.26      |             |
| h,k,lmax       | 12,24,10    | 12,24,10    |
| Nref           | 3451        | 3436        |
| Tmin,Tmax      | 0.933,0.989 | 0.647,0.746 |
| Tmin'          | 0.918       |             |

Correction method= # Reported T Limits: Tmin=0.647 Tmax=0.746  
 AbsCorr = MULTI-SCAN

Data completeness= 0.996 Theta(max)= 29.183

R(reflections)= 0.0495( 2600) wR2(reflections)= 0.1484( 3436)

S = 1.047

Npar= 207

The following ALERTS were generated. Each ALERT has the format

**test-name\_ALERT\_alert-type\_alert-level.**

Click on the hyperlinks for more details of the test.

---

### ● Alert level C

|                   |                                                  |       |        |
|-------------------|--------------------------------------------------|-------|--------|
| PLAT222_ALERT_3_C | NonSolvent Resd 1 H Uiso(max)/Uiso(min) Range    | 7.2   | Ratio  |
| PLAT230_ALERT_2_C | Hirshfeld Test Diff for O1 --C17                 | 6.8   | s.u.   |
| PLAT906_ALERT_3_C | Large K Value in the Analysis of Variance .....  | 4.078 | Check  |
| PLAT911_ALERT_3_C | Missing FCF Refl Between Thmin & STh/L= 0.600    | 6     | Report |
| PLAT913_ALERT_3_C | Missing # of Very Strong Reflections in FCF .... | 4     | Note   |

---

### ● Alert level G

|                   |                                                  |      |             |
|-------------------|--------------------------------------------------|------|-------------|
| PLAT002_ALERT_2_G | Number of Distance or Angle Restraints on AtSite | 3    | Note        |
| PLAT063_ALERT_4_G | Crystal Size Possibly too Large for Beam Size .. | 0.97 | mm          |
| PLAT172_ALERT_4_G | The CIF-Embedded .res File Contains DFIX Records | 1    | Report      |
| PLAT230_ALERT_2_G | Hirshfeld Test Diff for O3 --C17                 | 5.4  | s.u.        |
| PLAT301_ALERT_3_G | Main Residue Disorder .....(Resd 1 )             | 5%   | Note        |
| PLAT860_ALERT_3_G | Number of Least-Squares Restraints .....         | 2    | Note        |
| PLAT883_ALERT_1_G | No Info/Value for _atom_sites_solution_primary . |      | Please Do ! |
| PLAT912_ALERT_4_G | Missing # of FCF Reflections Above STh/L= 0.600  | 9    | Note        |
| PLAT933_ALERT_2_G | Number of OMIT Records in Embedded .res File ... | 2    | Note        |
| PLAT978_ALERT_2_G | Number C-C Bonds with Positive Residual Density. | 17   | Info        |

---

0 **ALERT level A** = Most likely a serious problem - resolve or explain  
0 **ALERT level B** = A potentially serious problem, consider carefully  
5 **ALERT level C** = Check. Ensure it is not caused by an omission or oversight  
10 **ALERT level G** = General information/check it is not something unexpected

1 ALERT type 1 CIF construction/syntax error, inconsistent or missing data  
5 ALERT type 2 Indicator that the structure model may be wrong or deficient  
6 ALERT type 3 Indicator that the structure quality may be low  
3 ALERT type 4 Improvement, methodology, query or suggestion  
0 ALERT type 5 Informative message, check

---

## Datablock: 5

---

Bond precision: C-C = 0.0018 A

Wavelength=0.71073

Cell: a=6.0820(2) b=18.7457(8) c=11.6861(5)

alpha=90 beta=98.759(2) gamma=90

Temperature: 296 K

|                | Calculated  | Reported    |
|----------------|-------------|-------------|
| Volume         | 1316.81(9)  | 1316.81(9)  |
| Space group    | P 21/n      | P 1 21/n 1  |
| Hall group     | -P 2yn      | -P 2yn      |
| Moiety formula | C18 H14 O2  | C18 H14 O2  |
| Sum formula    | C18 H14 O2  | C18 H14 O2  |
| Mr             | 262.29      | 262.29      |
| Dx,g cm-3      | 1.323       | 1.323       |
| Z              | 4           | 4           |
| Mu (mm-1)      | 0.085       | 0.085       |
| F000           | 552.0       | 552.0       |
| F000'          | 552.26      |             |
| h,k,lmax       | 8,26,16     | 8,26,16     |
| Nref           | 4027        | 4018        |
| Tmin,Tmax      | 0.962,0.979 | 0.711,0.746 |
| Tmin'          | 0.922       |             |

Correction method= # Reported T Limits: Tmin=0.711 Tmax=0.746  
AbsCorr = MULTI-SCAN

Data completeness= 0.998                      Theta(max)= 30.519

R(reflections)= 0.0634( 3032)              wR2(reflections)= 0.1769( 4018)

S = 1.137                                      Npar= 181

The following ALERTS were generated. Each ALERT has the format

**test-name\_ALERT\_alert-type\_alert-level.**

Click on the hyperlinks for more details of the test.

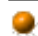

#### Alert level B

DIFMN02\_ALERT\_2\_B The minimum difference density is < -0.1\*ZMAX\*1.00

\_refine\_diff\_density\_min given = -1.023

Test value = -0.800

|                                                                    |            |
|--------------------------------------------------------------------|------------|
| PLAT097_ALERT_2_B Large Reported Max. (Positive) Residual Density  | 0.96 eA-3  |
| PLAT098_ALERT_2_B Large Reported Min. (Negative) Residual Density  | -1.02 eA-3 |
| PLAT934_ALERT_3_B Number of (Iobs-Icalc)/Sigma(W) > 10 Outliers .. | 6 Check    |

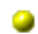

#### Alert level C

DIFMN03\_ALERT\_1\_C The minimum difference density is < -0.1\*ZMAX\*0.75

The relevant atom site should be identified.

DIFMX02\_ALERT\_1\_C The maximum difference density is > 0.1\*ZMAX\*0.75

The relevant atom site should be identified.

|                                                                    |            |             |
|--------------------------------------------------------------------|------------|-------------|
| PLAT911_ALERT_3_C Missing FCF Refl Between Thmin & STh/L=          | 0.600      | 5 Report    |
| PLAT918_ALERT_3_C Reflection(s) with I(obs) much Smaller I(calc) . |            | 6 Check     |
| PLAT939_ALERT_3_C Large Value of Not (SHELXL) Weight Optimized S . |            | 34.11 Check |
| PLAT977_ALERT_2_C Check Negative Difference Density on H2A         | -0.31 eA-3 |             |
| PLAT977_ALERT_2_C Check Negative Difference Density on H9          | -0.48 eA-3 |             |
| PLAT977_ALERT_2_C Check Negative Difference Density on H10         | -0.56 eA-3 |             |
| PLAT977_ALERT_2_C Check Negative Difference Density on H11         | -0.36 eA-3 |             |
| PLAT977_ALERT_2_C Check Negative Difference Density on H12         | -0.44 eA-3 |             |

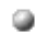

## Alert level G

|                                                                    |             |
|--------------------------------------------------------------------|-------------|
| PLAT063_ALERT_4_G Crystal Size Possibly too Large for Beam Size .. | 0.95 mm     |
| PLAT072_ALERT_2_G SHELXL First Parameter in WGHT Unusually Large   | 0.11 Report |
| PLAT720_ALERT_4_G Number of Unusual/Non-Standard Labels .....      | 2 Note      |
| PLAT793_ALERT_4_G Model has Chirality at C3 (Centro SPGR)          | R Verify    |
| PLAT883_ALERT_1_G No Info/Value for _atom_sites_solution_primary . | Please Do ! |
| PLAT912_ALERT_4_G Missing # of FCF Reflections Above STh/L= 0.600  | 4 Note      |
| PLAT978_ALERT_2_G Number C-C Bonds with Positive Residual Density. | 5 Info      |
| PLAT992_ALERT_5_G Repd & Actual _reflns_number_gt Values Differ by | 2 Check     |

---

0 **ALERT level A** = Most likely a serious problem - resolve or explain  
4 **ALERT level B** = A potentially serious problem, consider carefully  
10 **ALERT level C** = Check. Ensure it is not caused by an omission or oversight  
8 **ALERT level G** = General information/check it is not something unexpected

3 ALERT type 1 CIF construction/syntax error, inconsistent or missing data  
10 ALERT type 2 Indicator that the structure model may be wrong or deficient  
4 ALERT type 3 Indicator that the structure quality may be low  
4 ALERT type 4 Improvement, methodology, query or suggestion  
1 ALERT type 5 Informative message, check

---

## Validation response form

Please find below a validation response form (VRF) that can be filled in and pasted into your CIF.

```
# start Validation Reply Form
_vrf_DIFMN02_2
;
PROBLEM: The minimum difference density is < -0.1*ZMAX*1.00
RESPONSE: ...
;
_vrf_PLAT097_2
;
PROBLEM: Large Reported Max. (Positive) Residual Density      1.04 eA-3
RESPONSE: ...
;
_vrf_PLAT098_2
;
PROBLEM: Large Reported Min. (Negative) Residual Density      -1.04 eA-3
RESPONSE: ...
;
_vrf_PLAT919_2
;
PROBLEM: Reflection # Likely Affected by the Beamstop ...      1 Check
RESPONSE: ...
;
_vrf_PLAT934_2
;
PROBLEM: Number of (Iobs-Icalc)/Sigma(W) > 10 Outliers ..      4 Check
RESPONSE: ...
;
_vrf_DIFMN02_5
;
PROBLEM: The minimum difference density is < -0.1*ZMAX*1.00
RESPONSE: ...
;
_vrf_PLAT097_5
;
PROBLEM: Large Reported Max. (Positive) Residual Density      0.96 eA-3
```

```
RESPONSE: ...
;
_vrf_PLAT098_5
;
PROBLEM: Large Reported Min. (Negative) Residual Density -1.02 eA-3
RESPONSE: ...
;
_vrf_PLAT934_5
;
PROBLEM: Number of (Iobs-Icalc)/Sigma(W) > 10 Outliers .. 6 Check
RESPONSE: ...
;
# end Validation Reply Form
```

---

It is advisable to attempt to resolve as many as possible of the alerts in all categories. Often the minor alerts point to easily fixed oversights, errors and omissions in your CIF or refinement strategy, so attention to these fine details can be worthwhile. In order to resolve some of the more serious problems it may be necessary to carry out additional measurements or structure refinements. However, the purpose of your study may justify the reported deviations and the more serious of these should normally be commented upon in the discussion or experimental section of a paper or in the "special\_details" fields of the CIF. checkCIF was carefully designed to identify outliers and unusual parameters, but every test has its limitations and alerts that are not important in a particular case may appear. Conversely, the absence of alerts does not guarantee there are no aspects of the results needing attention. It is up to the individual to critically assess their own results and, if necessary, seek expert advice.

### **Publication of your CIF in IUCr journals**

A basic structural check has been run on your CIF. These basic checks will be run on all CIFs submitted for publication in IUCr journals (*Acta Crystallographica*, *Journal of Applied Crystallography*, *Journal of Synchrotron Radiation*); however, if you intend to submit to *Acta Crystallographica Section C* or *E* or *IUCrData*, you should make sure that full publication checks are run on the final version of your CIF prior to submission.

### **Publication of your CIF in other journals**

Please refer to the *Notes for Authors* of the relevant journal for any special instructions relating to CIF submission.

---

**PLATON version of 03/06/2021; check.def file version of 02/06/2021**

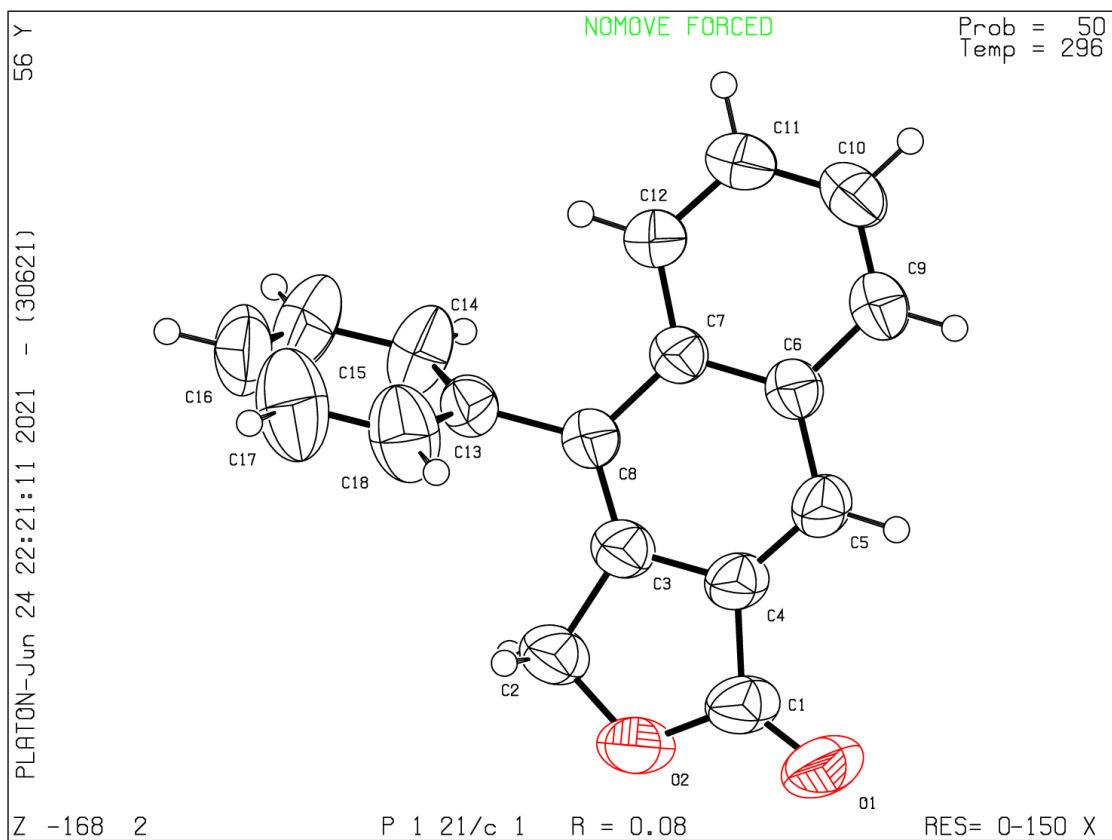

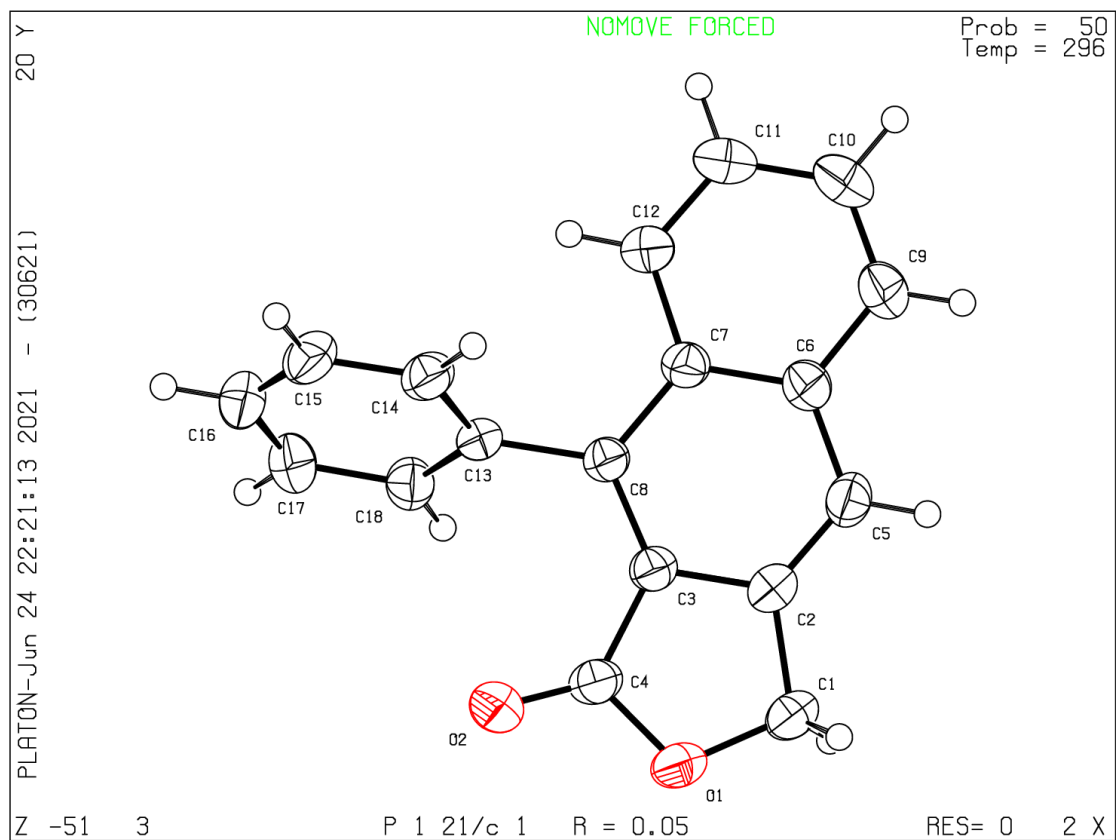

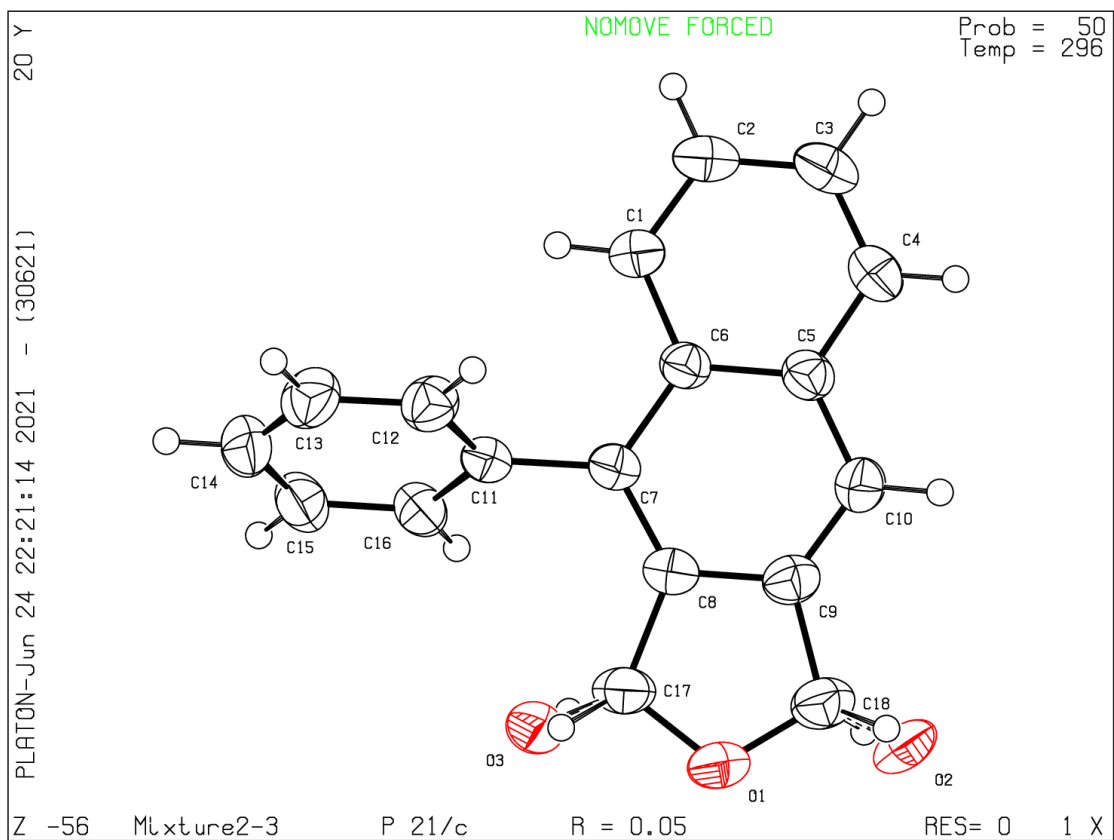

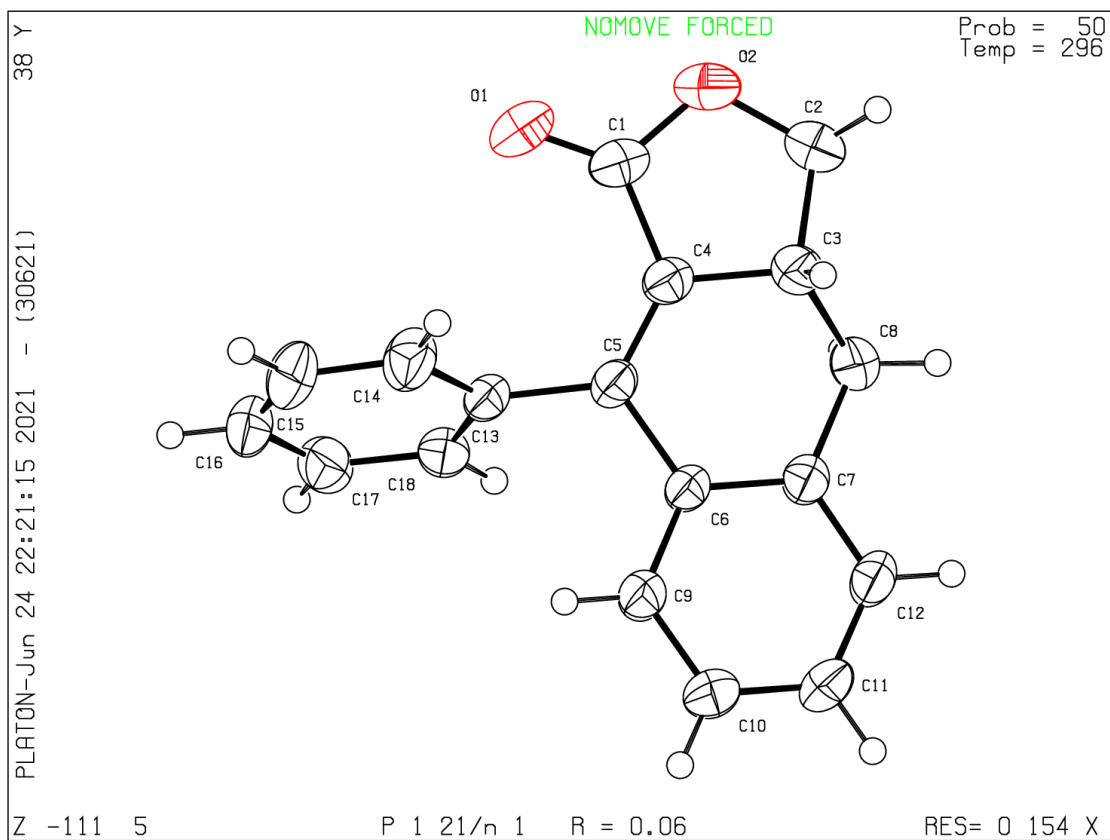

Supplement: s1 [file s1 › checkcif.pdf]
