# Supplementary material for: 4-Phenylnaphtho[2,3-c]furan-1(3H)-one, 9-Phenylnaphtho[2,3-c]furan-1(3H)-one and 3a,4-Dihydro-9-phenylnaphtho[2,3-c]furan-1(3H)-one Crystal Structures
Source: MDPI journal article supplement (doi:10.3390/cryst11080857), 2021-07-23
Supplement: s1 [file s1]

Archive with 2 entries (2 files):
- checkcif.pdf
- W Zhou Crystals ESI.pdf
