# Supplementary material for: 4-Phenylnaphtho[2,3-c]furan-1(3H)-one, 9-Phenylnaphtho[2,3-c]furan-1(3H)-one and 3a,4-Dihydro-9-phenylnaphtho[2,3-c]furan-1(3H)-one Crystal Structures
Source: MDPI journal article supplement (doi:10.3390/cryst11080857), 2021-07-23
Supplement: s1 [file s1 › W Zhou Crystals ESI.pdf]

Communication

# 4-Phenylnaphtho[2,3-c]furan-1(3H)-one, 9-Phenylnaphtho[2,3-c]furan-1(3H)-one and 3a,4-Dihydro-9-phenylnaphtho[2,3-c]furan-1(3H)-one structures.

Nabyl Merbouh, Simon Cassegrain and Wen Zhou\*

Department of Chemistry, Simon Fraser University. 8888 University Drive, Burnaby, BC V5A 1S6, Canada; nmerbouh@sfu.ca (N.M.); simon\_cassegrain@sfu.ca (S.C.)

\* Correspondence: wza54@sfu.ca

Supplementary Materials

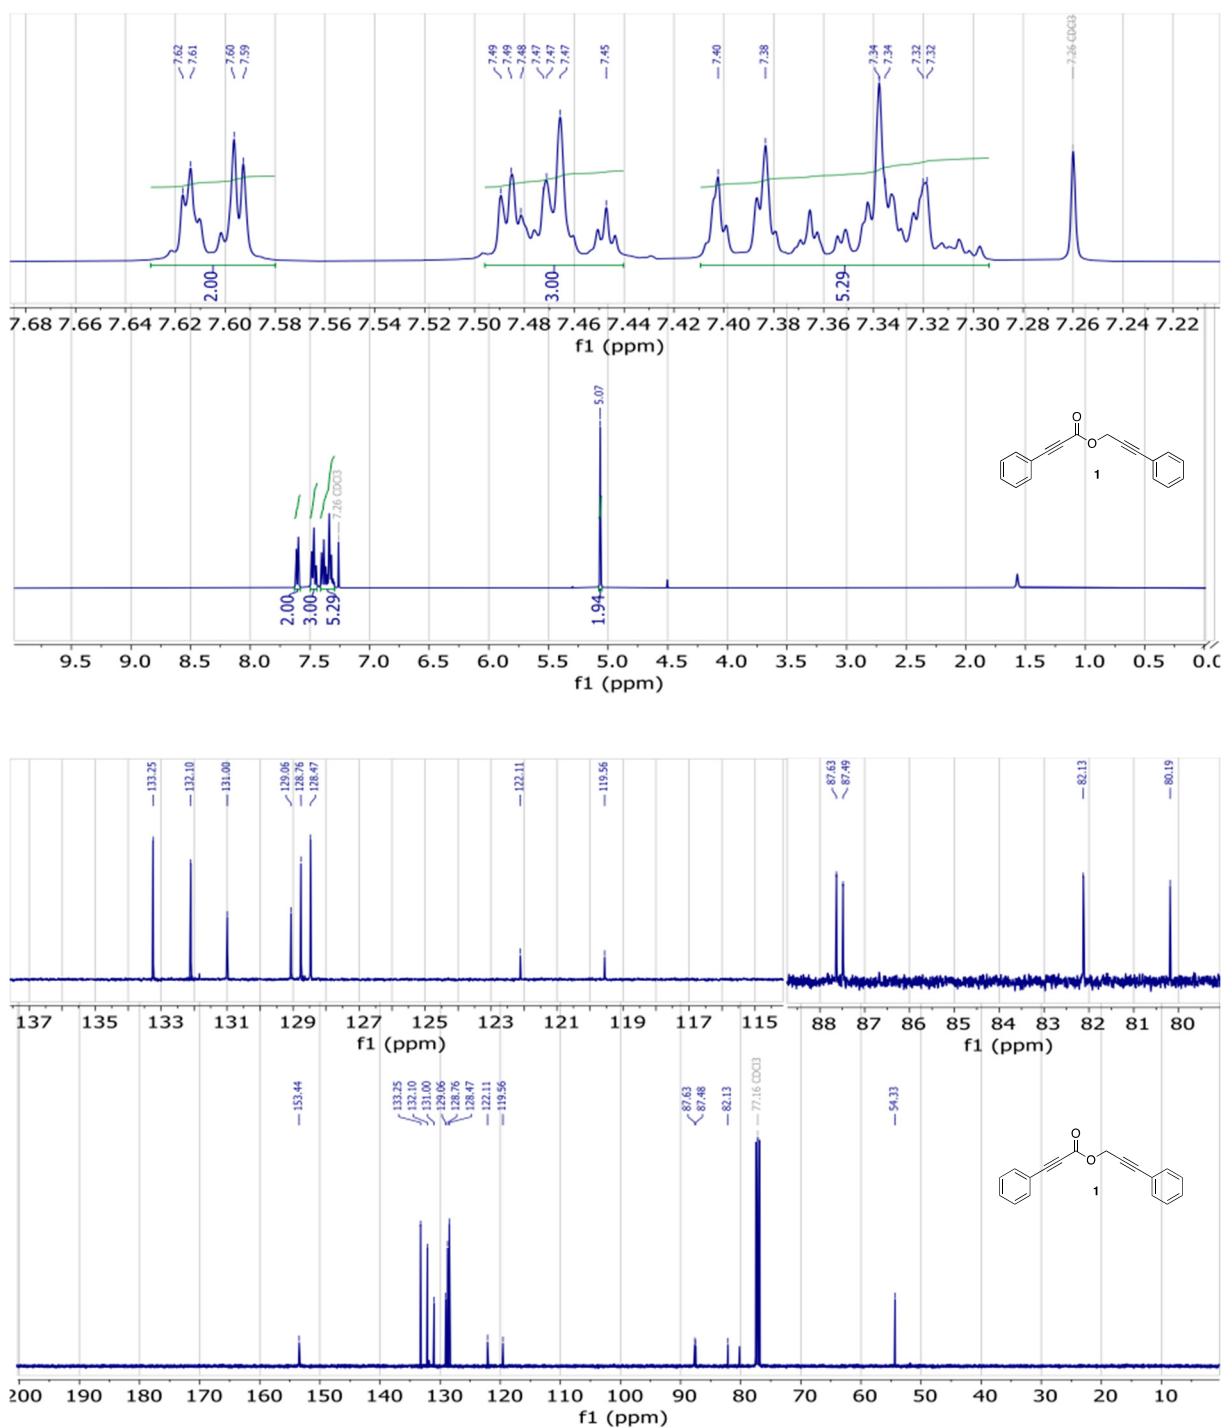

Figure S1.  $^1\text{H}$  and  $^{13}\text{C}$  NMR spectra (in  $\text{CDCl}_3$ ) of ester 1.

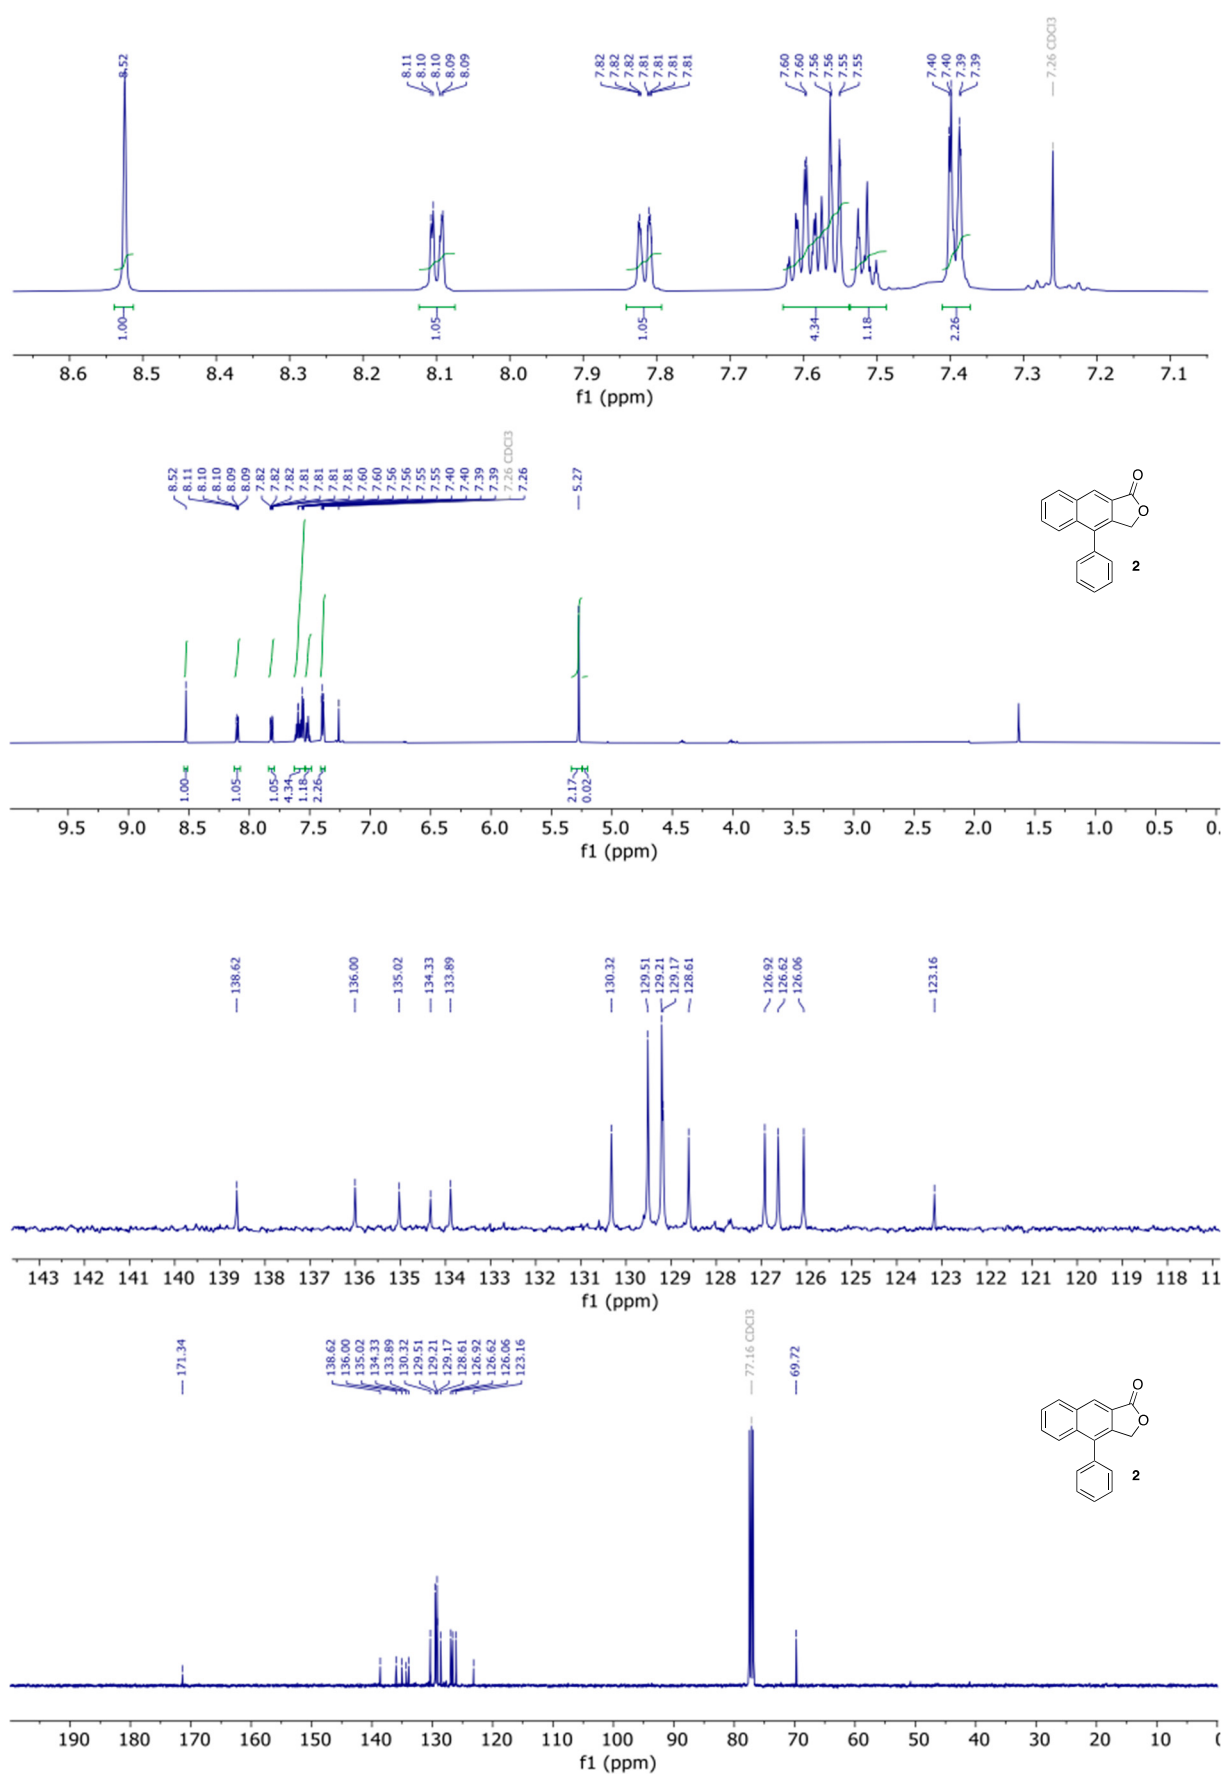

Figure S2.  $^1\text{H}$  and  $^{13}\text{C}$  NMR spectra (in  $\text{CDCl}_3$ ) of aryl naphthalene lactone **2**.

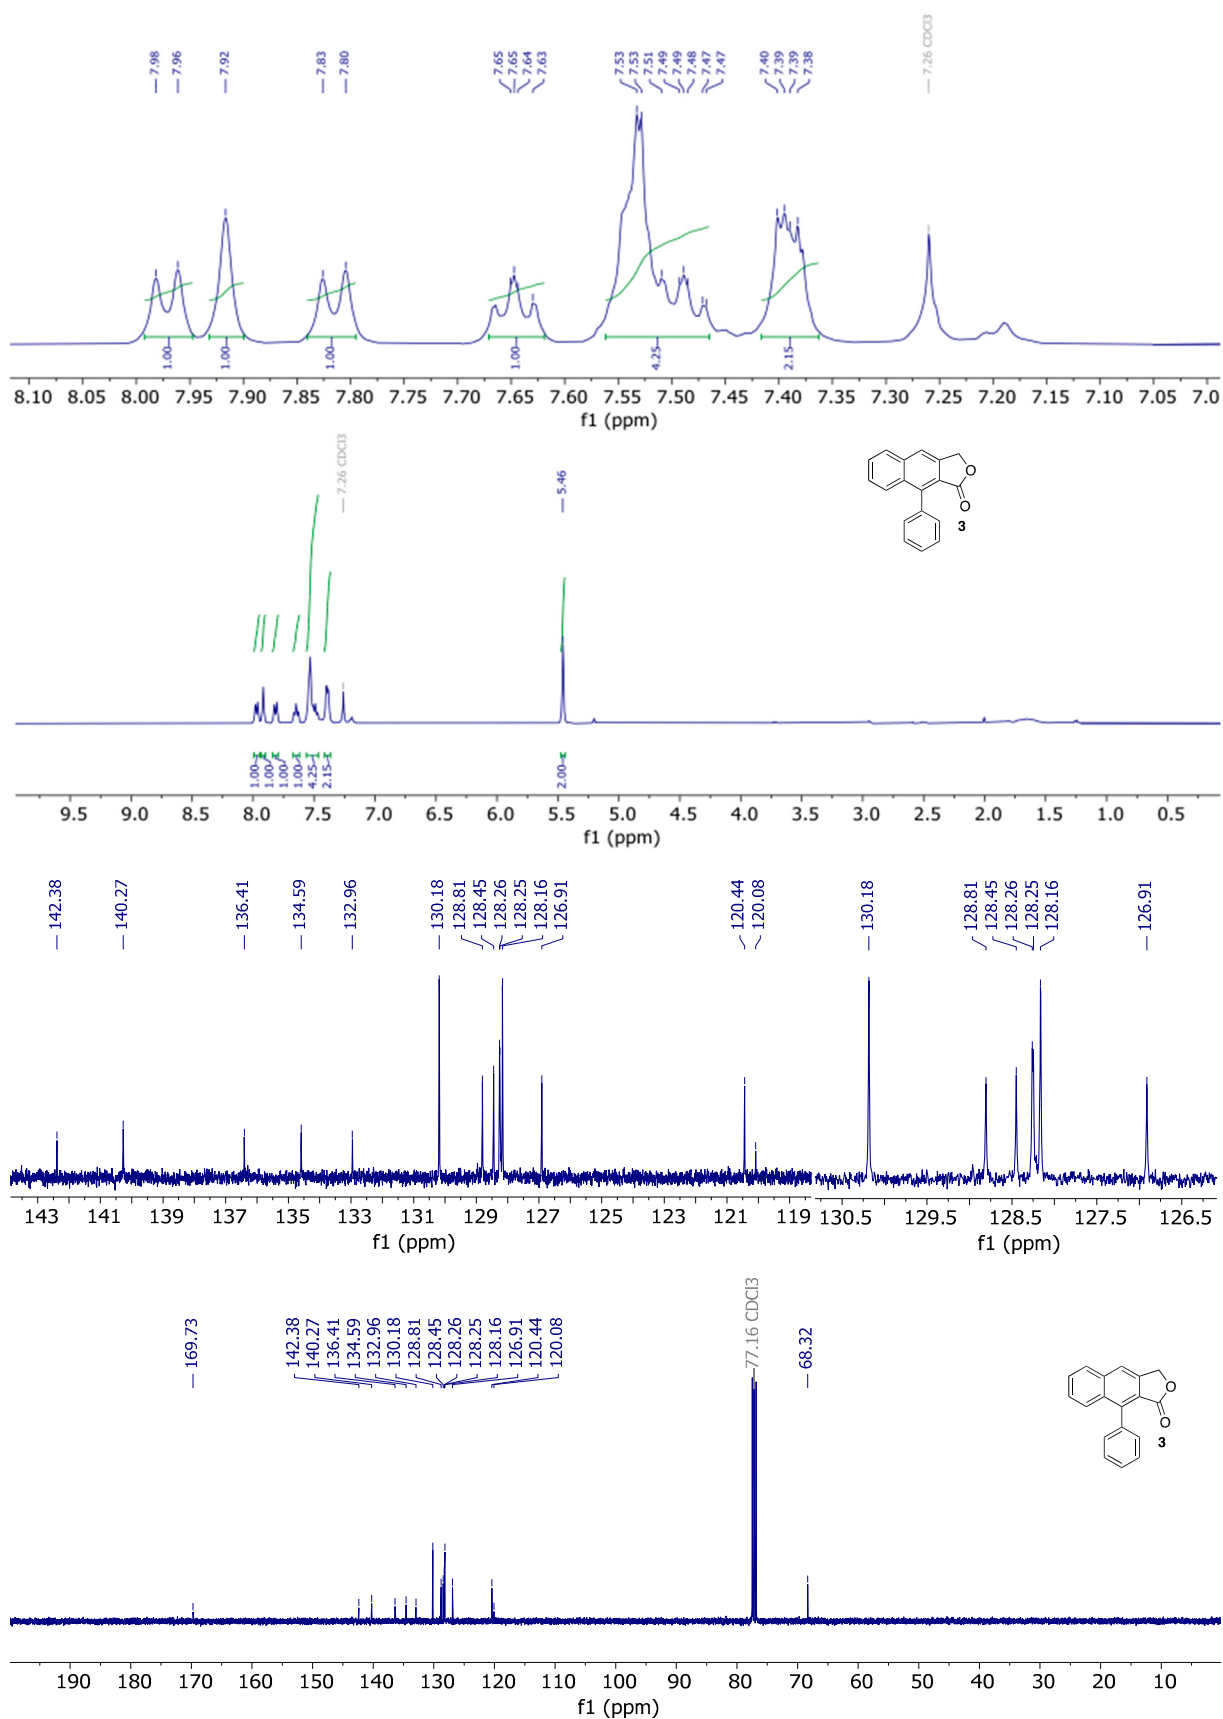

Figure S3.  $^1\text{H}$  and  $^{13}\text{C}$  NMR spectra (in  $\text{CDCl}_3$ ) of arylanthalene lactone **3**.

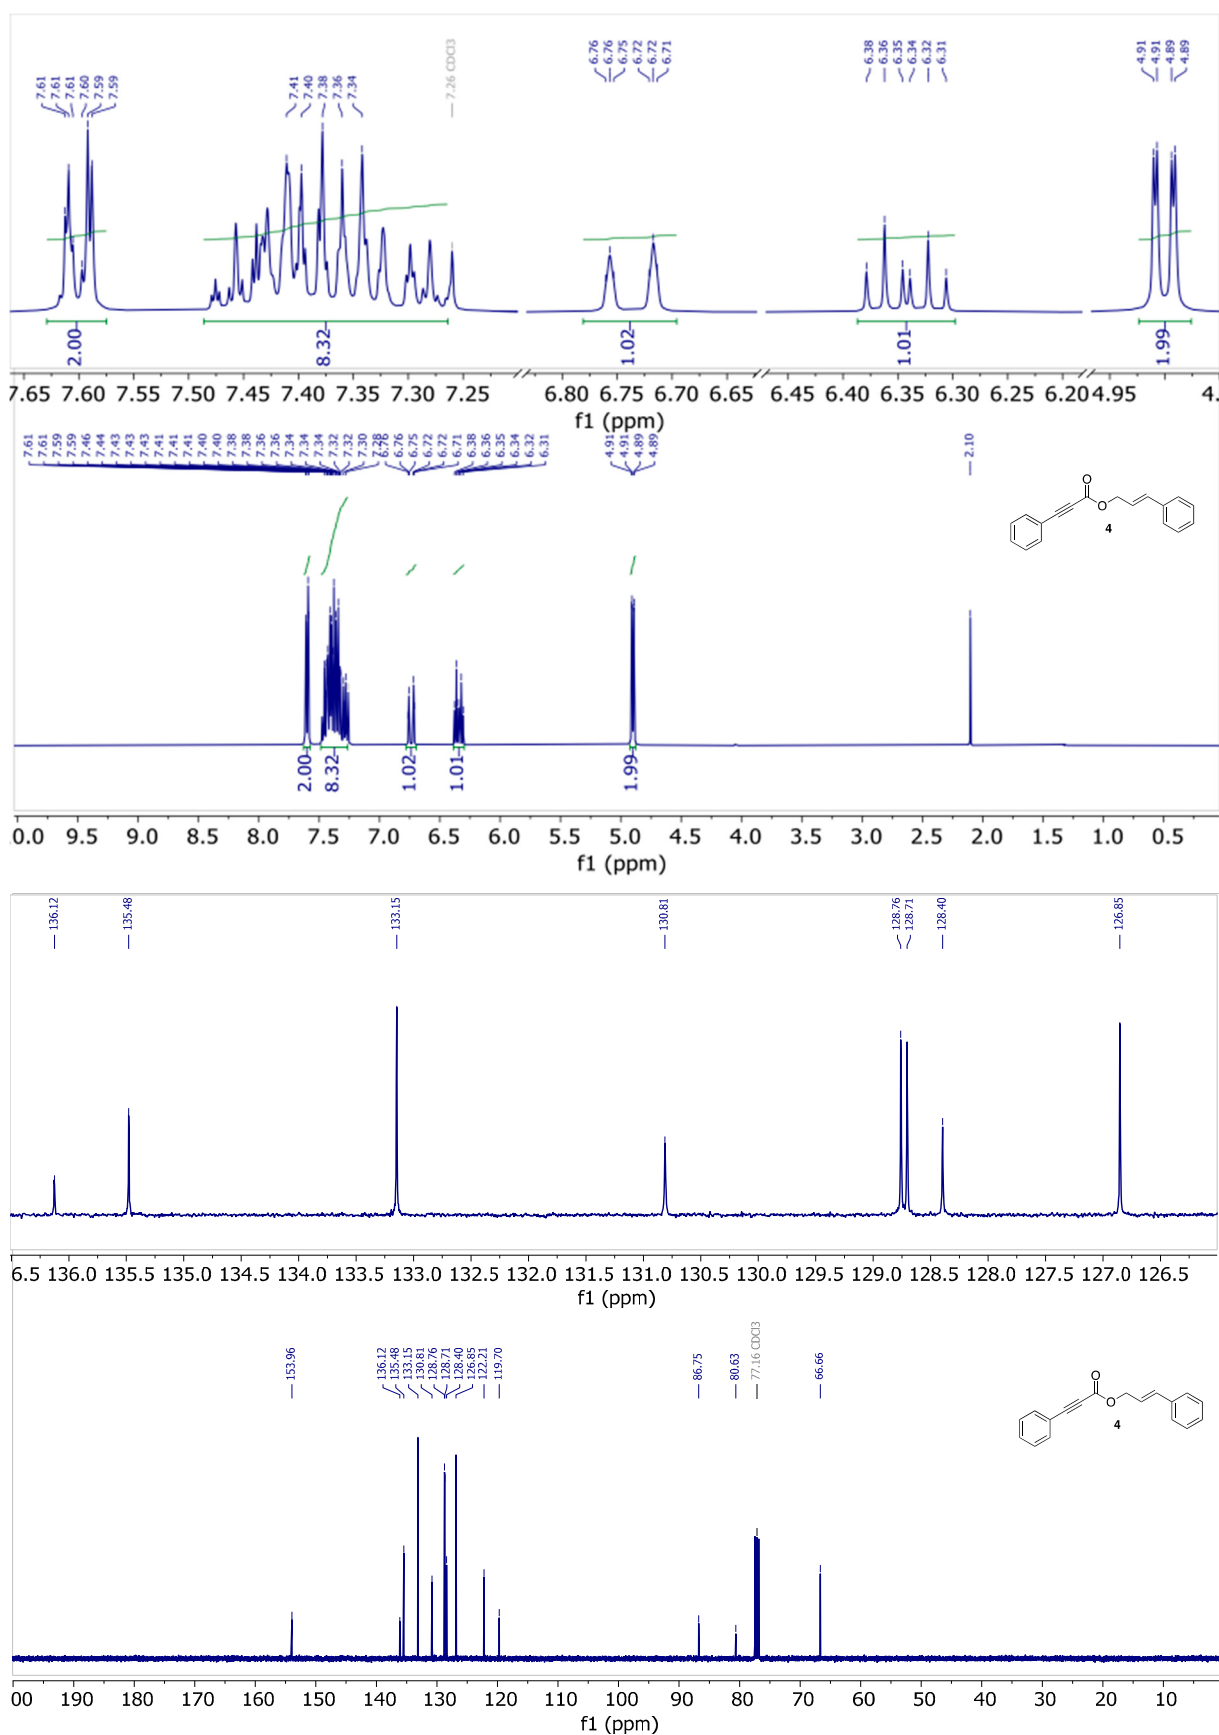

Figure S4.  $^1\text{H}$  and  $^{13}\text{C}$  NMR spectra (in  $\text{CDCl}_3$ ) of ester 4.

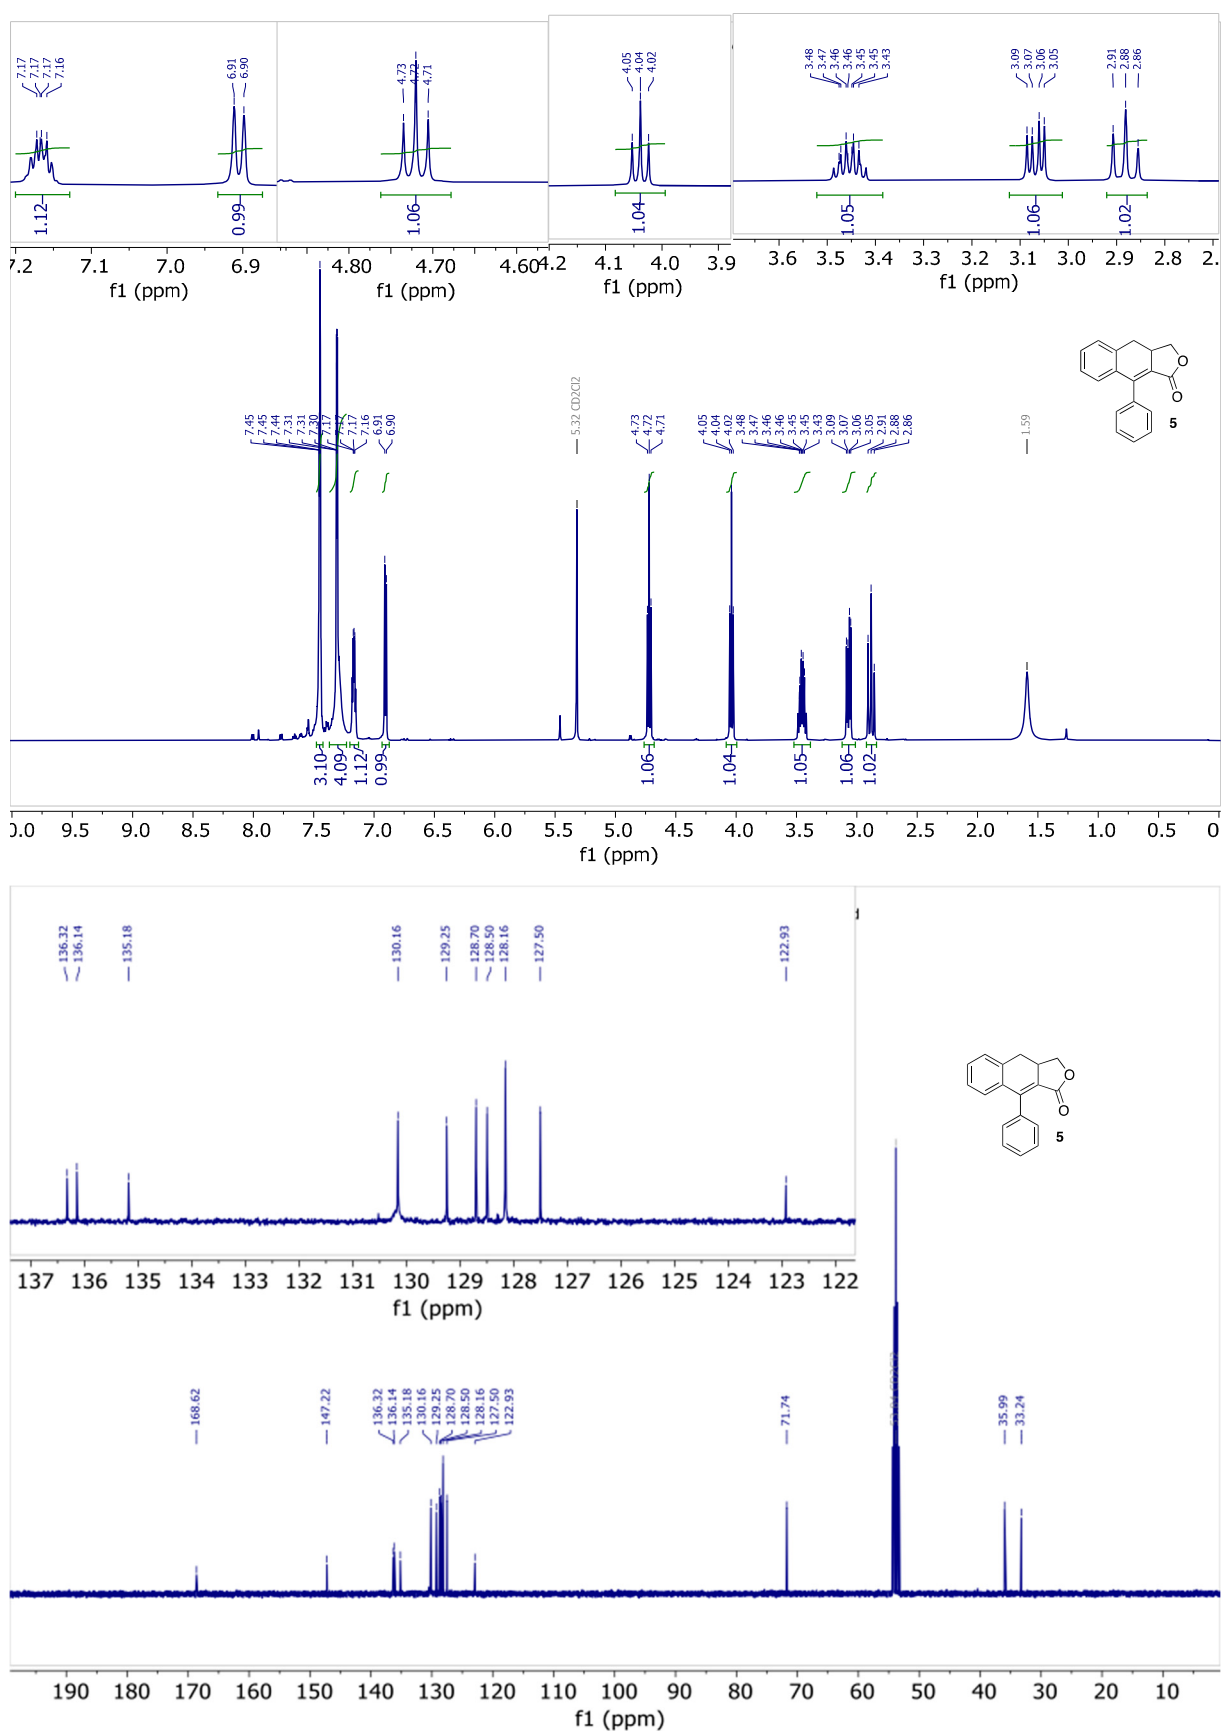

Figure S5.  $^1\text{H}$  and  $^{13}\text{C}$  NMR spectra (in  $\text{CD}_2\text{Cl}_2$ ) of lactone **5**.

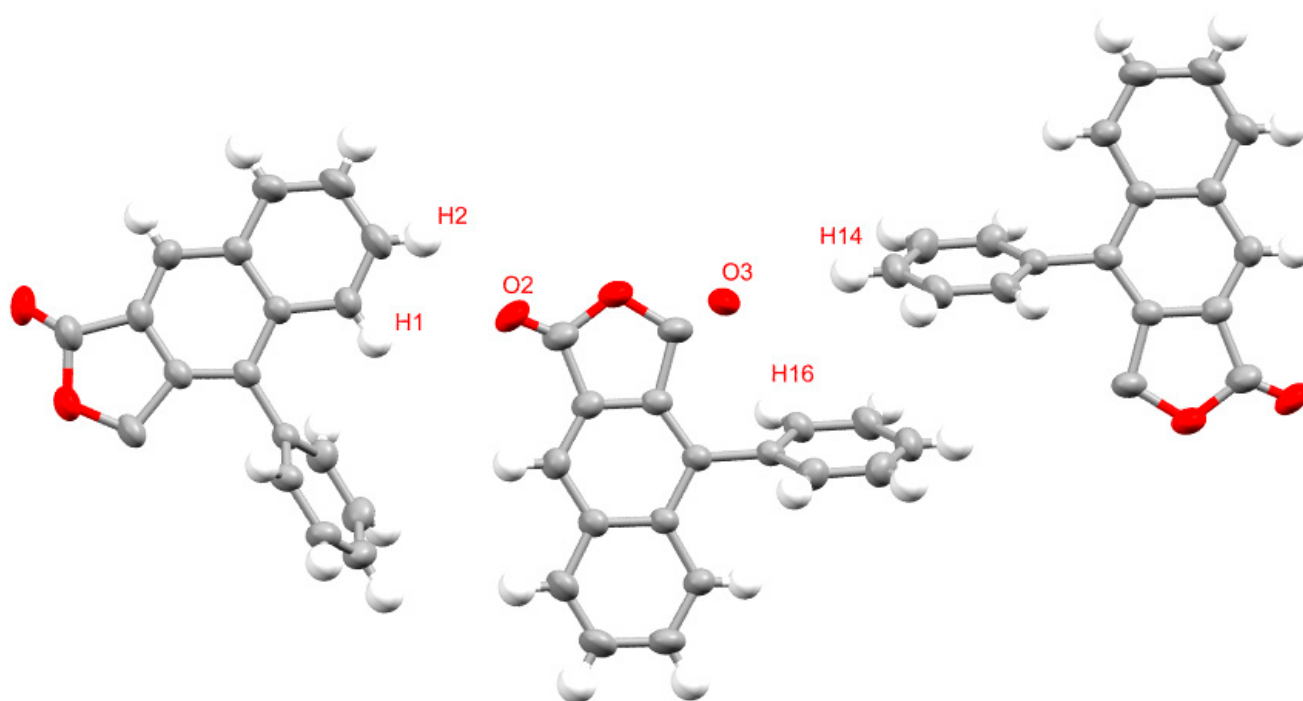

**Figure S6.** Mixture 2-3 crystallize with two of isomers in the asymmetric unit and stabilized by hydrogen bond interaction of O3-H14, O3-H16, and O2-H1, O2-H2.

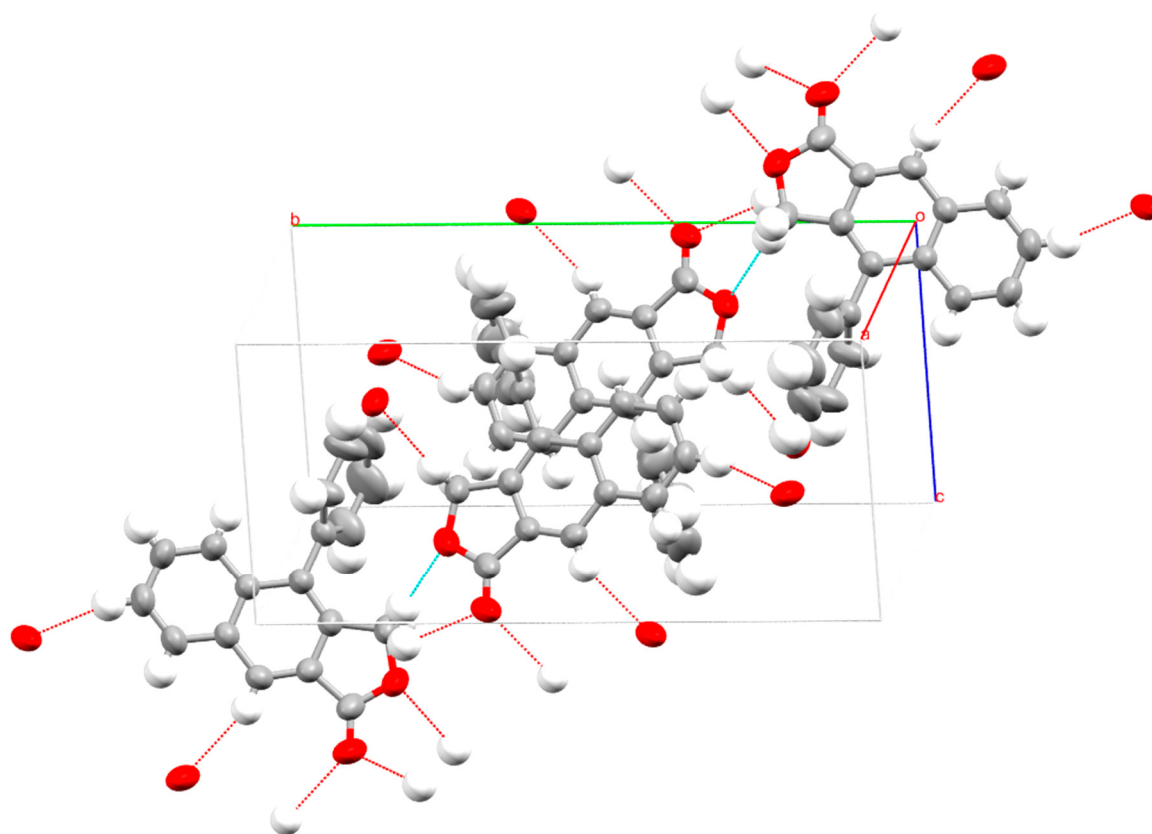

**Figure S7.** Packing and short contact for compound 2

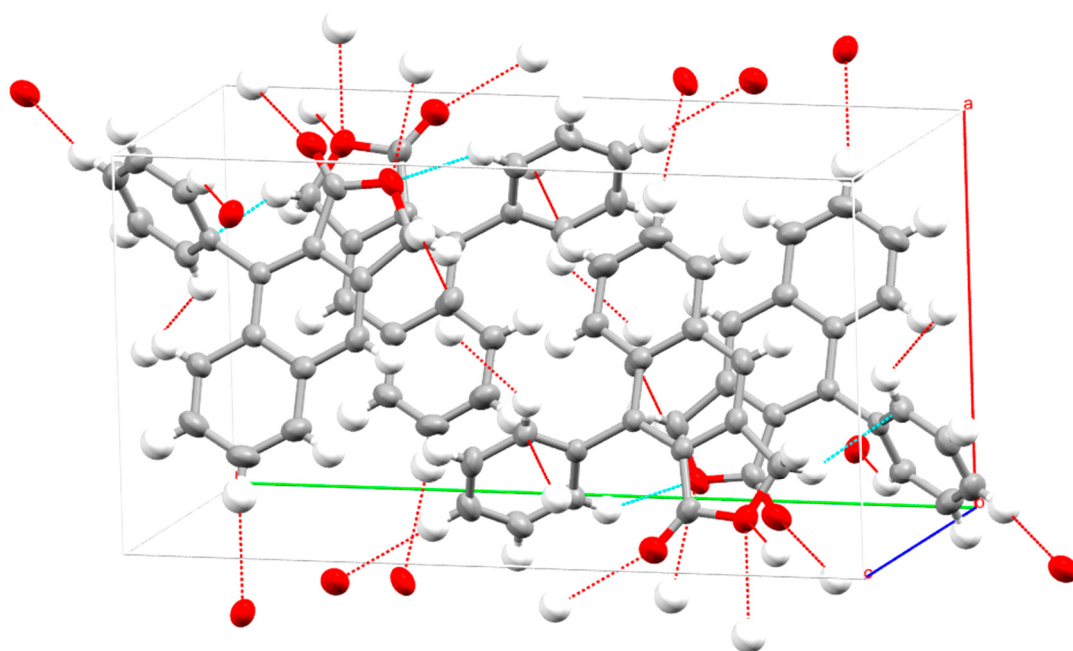

Figure S8. Packing and short contact for compound 3.

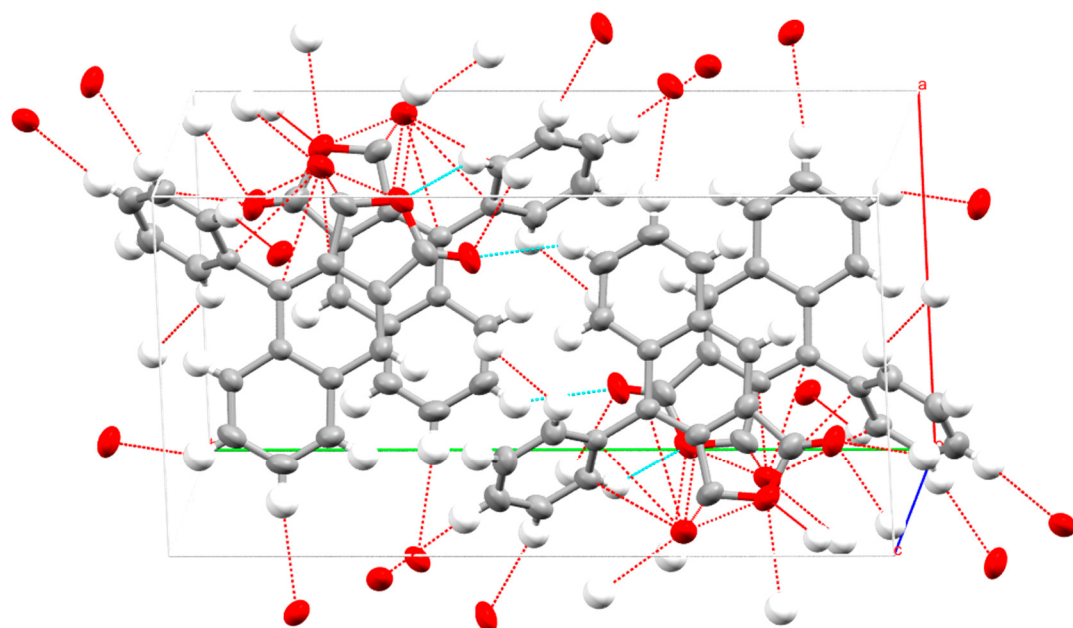

Figure S9. Packing and short contact for mixture 2-3.

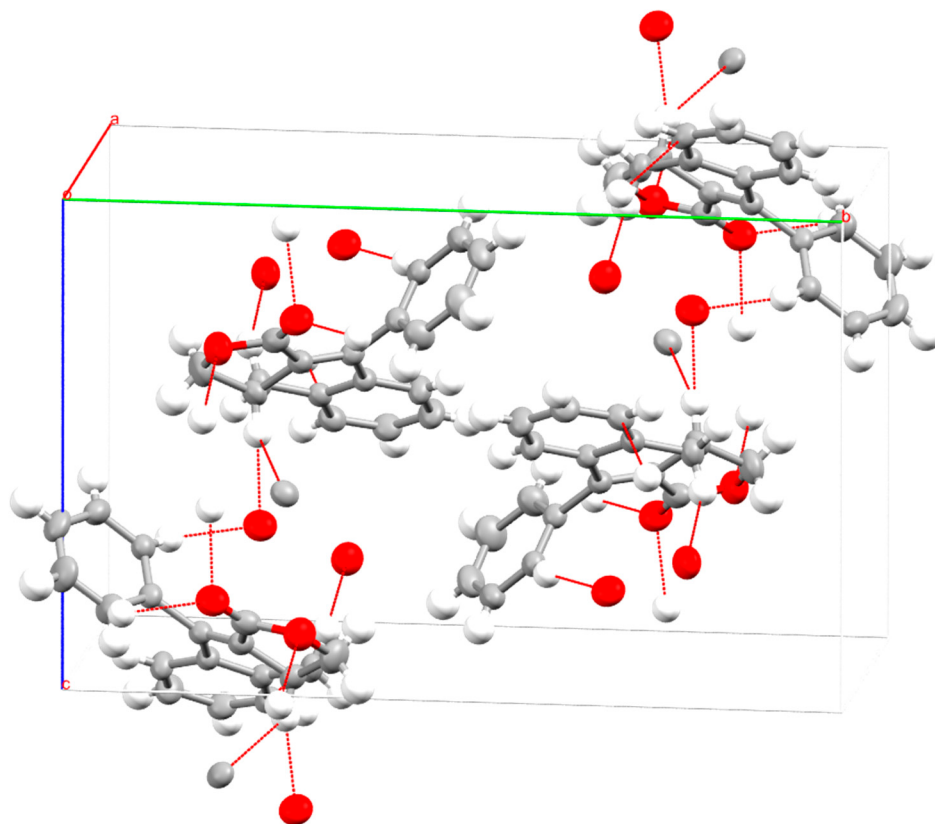

**Figure S10.** Packing and short contact for compound 5.

**Supplementary Materials:** The following are available online at [www.mdpi.com/xxx/s1](http://www.mdpi.com/xxx/s1),  $^1\text{H}/^{13}\text{C}$  NMR spectra of all compounds described **1–5** (Figures S1–S5), asymmetric unit for **mixture 2,3** (Figure S6), and packing diagrams of compounds **2**, **3** **mixture 2,3** and compound **5** (Figures S7–S10)

**Author Contributions:** Conceptualization, N.M. and S.C.; methodology, N.M. and W.Z.; software, W.Z.; validation, W.Z.; formal analysis, W.Z.; investigation, N.M.; resources, N.M. and W.Z.; data curation, W.Z.; writing—original draft preparation, N.M., S.C. and W.Z.; writing—review and editing, N.M. and W.Z.; visualization, W.Z.; project administration, N.M. All authors have read and agreed to the published version of the manuscript.

**Data Availability Statement:** Not applicable.

**Acknowledgments:** The authors would like to thank the Simon Fraser University Dean of Science Office, and the Chemistry Department for their generous financial support, and Prof. D. Leznoff (Simon Fraser University) for his critical review of this manuscript.

**Conflicts of Interest:** The authors declare no conflict of interest.
